# Supplementary material for: Correlation Analysis of Microbial Contamination and Alkaline Phosphatase Activity in Raw Milk and Dairy Products
Source: MDPI journal article supplement (doi:10.3390/ijerph20031825), 2023-01-19
Supplement: s1 [file s1]

**Supplementary Table S1.** Sampling amount for each province.

| <b>Province (municipality)</b> | <b>Sampling Amount</b> |
|--------------------------------|------------------------|
| Hebei                          | 106                    |
| Neimenggu                      | 110                    |
| Heilongjiang                   | 120                    |
| Shanghai                       | 103                    |
| Jiangsu                        | 111                    |
| Zhejiang                       | 126                    |
| Fujian                         | 111                    |
| Shandong                       | 143                    |
| Henan                          | 112                    |
| Hubei                          | 101                    |
| Guangdong                      | 112                    |
| Shanxi                         | 100                    |
| Gansu                          | 148                    |
| Total amount                   | 1503                   |
